# Supplementary material for: Analysis of immunogenic cell death in ascending thoracic aortic aneurysms based on single-cell sequencing data
Source: Front Immunol. 2023 May 3;14:1087978. doi: 10.3389/fimmu.2023.1087978 (PMC10191229; doi:10.3389/fimmu.2023.1087978)
Supplement: Supplementary file 13 [file DataSheet_3.xlsx]

## Sheet: dd
	cluster	ID	Description	GeneRatio	BgRatio	pvalue	p.adjust	qvalue	geneID	Count
1	Endothelial	hsa05164	Influenza A	72/1338	171/8163	6.94987e-16	2.25176e-13	1.29487e-13	3123/3122/3113/3569/3115/3127/8743/3119/3383/90865/3108/8503/3117/3109/9021/8766/4261/8797/637/3111/4939/3118/834/4792/7132/3459/7706/3551/5371/8795/10241/896/64135/3665/103/10379/3716/7099/5595/3455/4940/4938/23586/3838/4615/4599/836/10000/4790/4928/29110/2224/29108/3460/3576/5610/3454/5291/91543/1021/317/5970/2033/6773/10482/29107/7514/1387/6347/3337/3836/51135	72
2	Endothelial	hsa05167	Kaposi sarcoma-associated herpesvirus infection	76/1338	194/8163	1.19894e-14	1.45434e-12	8.36319e-13	3106/3133/2791/3569/3105/3107/3383/8503/9976/3134/5336/5155/3572/637/5600/4609/3709/5530/3710/4792/7538/7132/4773/2920/1499/3459/6774/4067/3551/5925/1026/5743/81631/3665/10379/3716/3091/5595/3455/5335/3845/4893/836/2932/10000/4790/5533/7157/5534/2353/29110/4775/2787/2782/5879/3576/5610/3725/3454/5291/1021/83439/5289/7316/5599/5970/1827/59345/4772/2033/6773/3708/2921/1432/1387/9261	76
3	Endothelial	hsa05169	Epstein-Barr virus infection	78/1338	202/8163	1.34661e-14	1.45434e-12	8.36319e-13	3123/3122/3106/3133/3113/3569/3115/3127/3105/567/3107/3119/3383/3108/8503/3117/3134/5336/3109/6890/6891/637/3111/953/5600/4609/4939/3118/4792/6892/6774/4067/3551/5925/7128/896/1026/3280/3665/10379/3716/10018/3455/4940/4938/23586/4615/4791/836/958/4734/10000/4790/7157/51426/3065/29110/5971/5879/5610/8737/3725/3454/5291/1021/1017/317/5599/965/5970/22938/7874/6773/5718/25942/1432/9612/51135	78
4	Endothelial	hsa05163	Human cytomegalovirus infection	83/1338	225/8163	3.92125e-14	3.17621e-12	1.82648e-12	3106/3133/2791/3569/3105/567/3107/8503/196883/3134/23236/6890/6891/5829/637/5600/4609/3709/5530/3710/4792/6892/7132/4773/1499/6774/3551/3554/5925/2776/2185/2771/1026/6387/5743/9138/3716/5595/23365/1398/3845/5332/11214/4893/836/2932/6376/115004/10000/4790/5533/7157/5534/6667/29110/2773/4775/2787/1388/2782/5879/3576/8737/5331/5291/6654/7249/1021/10672/2767/6198/6351/5970/59345/4772/9560/3708/6655/6…	83
5	Endothelial	hsa05166	Human T-cell leukemia virus 1 infection	80/1338	222/8163	4.93543e-13	3.19816e-11	1.8391e-11	3123/3122/3106/3133/3113/3569/3115/3127/3105/567/3107/7048/3119/8829/3383/2113/3108/8503/3117/196883/3134/3109/2114/3111/4609/4214/3118/5530/4792/7538/7132/4773/2005/3601/3551/1959/3554/2648/5925/896/1958/1026/3716/5595/3845/4055/4893/4791/958/4215/10000/4790/5533/7157/5534/2353/2224/996/331/6776/4775/1388/5423/5971/3725/4087/821/5291/1017/6777/5599/1739/5970/4772/2033/472/7514/1386/1387/4088	80
6	Endothelial	hsa05417	Lipid and atherosclerosis	76/1338	215/8163	5.85054e-12	3.15929e-10	1.81675e-10	6401/3569/8743/3383/8503/23236/6403/4846/9619/948/8797/637/5600/5468/5530/834/4792/7132/4773/2920/7412/23643/6774/4067/3551/8795/5908/929/3949/9138/3665/7099/5595/3312/5335/3845/5332/4893/840/998/4615/836/2932/958/6648/10000/4790/5533/7157/5534/22926/3304/2353/3303/29110/4775/29108/5879/3576/3725/5331/5291/317/4780/5599/5970/4772/3320/3329/3708/6349/2921/1432/6347/51135/5747	76
7	Endothelial	hsa05171	Coronavirus disease - COVID-19	79/1338	232/8163	1.94451e-11	8.15261e-10	4.68815e-10	7450/3569/8829/8503/6403/5336/1636/1440/3572/730/1839/5600/4939/834/4792/6234/7132/6222/6187/6774/3551/6229/6154/6170/6210/6158/25873/6175/6173/64135/103/10379/3716/7099/5595/6235/3455/6868/6206/4940/5335/4938/23586/6167/4615/4599/6136/6161/115004/4790/6160/6218/2353/29110/6181/6169/6135/3576/5610/3725/3454/5291/6194/6164/6209/5599/6192/200916/5970/6159/6773/11224/6137/6227/1432/6224/6347/51135/6…	79
8	Endothelial	hsa04659	Th17 cell differentiation	47/1338	108/8163	2.01299e-11	8.15261e-10	4.68815e-10	3123/3122/3113/3569/3115/3127/7048/3119/3108/3117/3109/3572/3111/5600/3118/5530/4792/9466/196/4773/3459/6774/3551/3554/3566/5914/3716/3091/5595/5335/6095/4790/5533/5534/2353/6776/4775/3460/3725/4087/6777/5599/5970/4772/3320/1432/4088	47
9	Endothelial	hsa05145	Toxoplasmosis	48/1338	112/8163	2.39453e-11	8.6203e-10	4.95709e-10	3123/3122/3113/3655/3115/3127/3119/3108/3117/3109/4261/3912/3111/5600/3118/4792/7132/3910/3459/3909/23643/6774/3551/2771/330/3949/3716/7099/5595/3312/3911/4615/836/958/10000/4790/329/3304/3303/2773/331/3913/3460/5599/5970/3915/1432/51135	48
10	Endothelial	hsa05132	Salmonella infection	82/1338	249/8163	5.56689e-11	1.80367e-09	1.0372e-09	3569/5420/8743/2317/9267/9844/6281/197259/8797/5286/57381/5600/4609/837/5287/834/4792/7132/1499/23643/3551/4646/8795/929/10095/1778/330/79792/7099/5595/4671/840/998/4615/836/5898/113146/1785/10000/4790/10097/83547/5878/329/2353/302/5868/382/5585/9648/3839/81873/29108/10006/5879/3576/8737/3725/84617/5291/79026/3831/60412/83439/5289/10627/10640/5599/10383/5970/203068/3320/55770/3840/23191/84516/796…	82
11	Endothelial	hsa05135	Yersinia infection	54/1338	137/8163	6.78687e-11	1.99904e-09	1.14955e-09	3569/8503/3678/8935/9844/5829/5600/10458/834/4792/6197/4773/6196/3551/2776/2185/10095/9138/7099/5595/23365/1398/5335/1793/998/4615/2932/10000/4790/10097/10163/2353/29110/5586/4775/382/5585/81873/29108/147179/5879/3576/8874/3725/5291/5599/5970/4772/9815/1432/6347/8394/51135/5747	54
12	Endothelial	hsa04933	AGE-RAGE signaling pathway in diabetic complications	43/1338	100/8163	2.32175e-10	6.26872e-09	3.60482e-09	6401/7056/3569/7048/3383/8503/23236/7424/5336/4846/5600/7412/6774/2308/1958/5581/5595/1906/5335/3845/5332/4893/998/836/10000/4790/1729/6776/1282/5879/3576/3725/5331/4087/5291/6777/5599/5970/5292/4772/1432/6347/4088	43
13	Endothelial	hsa04668	TNF signaling pathway	46/1338	112/8163	3.53798e-10	8.67383e-09	4.98788e-09	6401/3569/3383/8503/7424/7133/843/9021/197259/8837/5600/4792/7132/3659/602/2920/7412/3551/7128/330/5743/5595/1906/1435/1326/3726/840/836/6376/10000/4790/153090/329/2353/9252/1388/8737/3725/5291/5599/5970/10059/2921/1432/1386/6347	46
14	Endothelial	hsa05161	Hepatitis B	59/1338	162/8163	3.74795e-10	8.67383e-09	4.98788e-09	3569/7048/8503/843/3339/637/5600/4609/4214/1654/4792/4773/6774/3551/1959/5925/2185/1026/1960/64135/3665/3716/7099/5595/23586/3845/4893/4615/836/673/10000/4790/7157/2353/29110/6776/4775/1388/3576/3725/3454/5291/6654/7529/1017/317/6777/5599/5970/4772/2033/6773/7534/6655/1432/1386/1387/51135/4088	59
15	Endothelial	hsa04625	C-type lectin receptor signaling pathway	43/1338	104/8163	1.03895e-09	2.24414e-08	1.29049e-08	3569/8503/5336/5600/3709/5530/3710/834/4792/3659/602/4773/3551/10892/1959/8844/1960/5743/868/10379/5595/23365/3845/4893/4791/8915/10000/4790/5533/5534/4775/29108/5971/3725/5291/5599/1263/5970/4772/6773/3708/1432/9261	43
16	Endothelial	hsa05170	Human immunodeficiency virus 1 infection	70/1338	212/8163	1.29854e-09	2.62955e-08	1.51212e-08	3106/3133/2791/3105/567/3107/8503/3134/7133/5336/6890/6891/5829/637/5600/3709/5530/3710/684/4792/6892/7132/4773/3551/25939/2776/2185/2771/5062/7099/5595/1398/5335/3845/4893/4615/836/162/115004/10000/4790/5533/5534/3985/2353/29110/2773/4775/2787/2782/5879/8737/3725/5291/8905/2767/164/6198/5599/5970/59345/4772/3708/6921/472/8451/9730/1432/51135/5747	70
17	Endothelial	hsa04064	NF-kappa B signaling pathway	42/1338	104/8163	3.81505e-09	7.27104e-08	4.1812e-08	3383/5336/29775/8837/4792/7132/2920/7412/23643/7706/4067/3551/10892/3554/7128/929/6387/330/5743/7099/5335/23586/4055/4615/4791/958/8915/4790/329/331/5971/3576/8737/6351/5970/1457/9560/23085/472/2921/142/51135	42
18	Endothelial	hsa04658	Th1 and Th2 cell differentiation	38/1338	92/8163	1.00774e-08	1.81394e-07	1.0431e-07	3123/3122/3113/3115/3127/3119/3108/3117/4851/54567/28514/3714/3109/3111/5600/3118/5530/4792/4773/3459/3551/3566/3716/5595/5335/4790/5533/5534/2353/6776/4775/3460/3725/6777/5599/5970/4772/1432	38
19	Endothelial	hsa04621	NOD-like receptor signaling pathway	61/1338	184/8163	1.28122e-08	2.18482e-07	1.25638e-07	10628/3569/3428/115361/23236/22900/114769/10135/5600/3709/4939/837/3710/834/4792/2920/3551/7531/84674/7128/330/79792/81631/3665/10379/3716/2633/7099/5595/3455/4940/4938/22861/5332/55914/4671/4615/4790/329/29110/2635/331/5586/5585/29108/56919/3576/8737/3725/5331/3454/5599/5970/10059/3320/6773/3708/2921/1432/6347/51135	61
20	Endothelial	hsa04010	MAPK signaling pathway	85/1338	294/8163	3.06156e-08	4.95972e-07	2.85208e-07	2321/7048/3791/2317/7010/1942/1847/4296/7424/25780/5155/4233/5924/2324/408/1848/3481/5600/4609/4214/9344/5530/6197/7132/6196/2005/3551/4254/3554/51701/5908/929/9064/2122/2872/5062/1969/9693/3164/5595/1435/994/1326/1398/3312/9448/3845/4893/998/4615/4791/836/673/4215/10000/4790/4208/5533/7157/5534/3304/2353/3303/57551/9252/5921/4775/3727/1843/5971/5879/5536/4149/3725/5922/6654/5599/5970/4772/6655/4…	85
21	Endothelial	hsa05416	Viral myocarditis	28/1338	60/8163	3.78569e-08	5.55777e-07	3.19599e-07	3123/3122/3106/3133/3113/3115/3127/3105/3107/3119/3383/3108/3117/3134/3109/637/3111/3118/2534/27/857/1981/8672/1982/1604/836/958/5879	28
22	Endothelial	hsa03040	Spliceosome	51/1338	147/8163	3.80824e-08	5.55777e-07	3.19599e-07	1655/6434/2521/6432/6429/3192/23450/3312/23451/58517/84991/1665/6428/9939/7919/23350/9343/22985/3304/3303/55119/3190/6628/55660/6430/6427/7307/3183/29896/9879/10772/1659/10915/220988/6431/9716/9129/6636/10594/23020/22938/9984/10291/10523/11338/10285/9416/4670/151903/9785/51691	51
23	Endothelial	hsa05162	Measles	49/1338	139/8163	3.94533e-08	5.55777e-07	3.19599e-07	3569/8503/637/4939/4792/6774/3551/4478/7128/896/868/64135/3665/103/10379/3716/7099/3455/4940/3312/4938/23586/4615/4599/836/2932/10000/4790/7157/10399/3304/2353/3303/29110/6776/5610/3725/3454/440275/5291/1021/1017/317/6777/5599/5970/1457/6773/51135	49
24	Endothelial	hsa05160	Hepatitis C	53/1338	157/8163	5.88032e-08	7.93843e-07	4.56498e-07	7122/8503/949/9021/637/8837/4609/4939/4792/7132/1499/6774/3551/7531/5925/1026/5519/3949/3665/10379/3716/5595/3455/4940/4938/23586/3845/4893/4599/836/2932/673/10000/4790/5520/7157/29110/5610/3434/8737/3454/440275/5291/91543/6654/1021/7529/1017/317/5970/6773/7534/6655	53
25	Endothelial	hsa05131	Shigellosis	73/1338	247/8163	1.12528e-07	1.45836e-06	8.38627e-07	8503/3678/23236/9267/9844/5336/5829/54874/5600/3709/837/3710/834/4792/7132/3551/10892/2308/3554/25851/10241/929/10095/81631/5581/7099/5595/1398/5335/1793/5332/7323/4671/998/4615/2932/8915/115004/10000/4790/1729/10097/7157/10163/29110/826/11335/9252/824/3059/382/7307/81873/29108/7335/5879/3576/8737/3725/5331/5291/30849/5289/10627/7316/6198/5599/5970/3708/472/1432/831/5747	73
26	Endothelial	hsa04218	Cellular senescence	52/1338	156/8163	1.24947e-07	1.55703e-06	8.9537e-07	3106/3133/3569/3105/3107/7048/2113/8503/3134/5600/4609/3709/5530/3710/677/4773/2308/5925/10114/896/1026/5595/3845/678/4893/5499/10000/4790/5533/7157/5534/28996/10758/824/4775/3576/4087/5291/7249/1021/1017/4361/5970/4772/5883/5928/3708/1874/472/1432/9261/4088	52
27	Endothelial	hsa04722	Neurotrophin signaling pathway	42/1338	119/8163	3.53687e-07	4.24424e-06	2.44065e-06	8503/5336/5600/11213/4214/4792/10019/6197/6464/2889/6196/3551/7531/5908/25759/5595/1398/5335/3845/397/4893/998/2932/673/4215/10000/4790/7157/9252/5879/3725/5291/6654/11108/5599/5970/5663/6655/1432/396/9261/51135	42
28	Endothelial	hsa04210	Apoptosis	46/1338	136/8163	4.1232e-07	4.77113e-06	2.74363e-06	8743/8503/1512/3563/843/1075/8797/637/8837/3709/1439/1520/4170/3710/4792/7132/3551/8795/143/6709/330/5366/10018/5595/3845/4893/840/836/10000/4790/7157/153090/329/2353/4000/331/824/8737/3725/5291/317/5599/5970/3708/472/142	46
29	Endothelial	hsa03013	Nucleocytoplasmic transport	39/1338	108/8163	4.69357e-07	5.24385e-06	3.01547e-06	51194/10762/25909/3838/9939/7919/22985/4928/5411/5903/7175/26019/3839/8021/10921/55746/23279/23511/64328/9818/9984/9972/3840/10250/10482/79902/9883/29107/3842/7514/65110/81929/1434/100101267/57122/11260/9631/3837/3836	39
30	Endothelial	hsa05130	Pathogenic Escherichia coli infection	60/1338	197/8163	4.99497e-07	5.39457e-06	3.10214e-06	7122/3569/8743/55930/9267/8797/5600/837/4651/10458/834/2534/4792/7132/2149/7082/3551/4644/4646/3554/8795/10095/9138/4690/5062/7099/5595/23365/4671/840/998/4615/836/4790/10097/4643/10163/2353/7009/3059/382/81873/29108/147179/10006/5879/3576/8737/3725/84617/10427/10672/5599/10383/5970/203068/23191/1432/51135/10802	60
31	Endothelial	hsa05210	Colorectal cancer	33/1338	86/8163	7.27989e-07	7.60866e-06	4.37535e-06	7048/8503/5900/4609/1499/5899/1026/5366/10018/5595/3845/4893/836/5898/2932/673/10000/7157/51426/2353/4436/5879/3725/4087/5291/6654/83439/324/6198/5599/6655/4088/26060	33
32	Endothelial	hsa05203	Viral carcinogenesis	61/1338	204/8163	8.08914e-07	7.95024e-06	4.57177e-06	3106/3133/3105/3107/8503/3134/3572/5829/51564/1654/4792/6774/4067/7531/1959/2648/5925/896/1026/1960/5366/6672/3665/5966/10379/3716/5595/3845/4055/4893/998/4791/836/4790/7157/2934/3065/3190/6776/1388/5423/5879/5610/3725/5922/5291/1021/7529/1017/6777/1739/5970/22938/2033/7874/7534/7337/23352/1386/1387/9261	61
33	Endothelial	hsa05142	Chagas disease	37/1338	102/8163	8.09746e-07	7.95024e-06	4.57177e-06	3569/7048/8503/23236/1636/624/8837/5600/4792/7132/3459/3551/2776/2771/5519/7099/5595/5332/4615/10000/4790/5520/2353/2773/3460/3576/3725/5331/4087/5291/2767/5599/5970/6349/1432/6347/51135	37
34	Endothelial	hsa05220	Chronic myeloid leukemia	30/1338	76/8163	1.14788e-06	1.09386e-05	6.29024e-06	7048/8503/4609/4792/6464/3551/613/5925/1026/25759/2122/5595/1398/3845/4893/673/10000/4790/7157/51426/3065/6776/5291/6654/1021/6777/867/5970/6655/4088	30
35	Endothelial	hsa05202	Transcriptional misregulation in cancer	58/1338	193/8163	1.25883e-06	1.16532e-05	6.70116e-06	5327/2321/3569/7102/7048/4005/2313/4233/3087/1655/221037/1848/4609/4086/5468/4299/4066/2005/2308/5371/3728/929/2521/1026/330/5914/5966/64332/862/51274/2078/55589/958/904/4790/2130/4208/7157/51426/329/6667/3065/3576/4149/8148/2530/1025/5970/4291/7704/7403/2115/25942/472/4300/905/2120/5747	58
36	Endothelial	hsa04935	Growth hormone synthesis, secretion and action	41/1338	120/8163	1.29548e-06	1.16593e-05	6.70466e-06	8503/196883/8835/23236/5336/9021/5600/3709/4214/3710/6464/6774/2776/2771/25759/5595/1398/5335/3845/5332/3726/4893/2932/10000/2353/2773/6776/1388/5331/5291/6654/2767/6777/5599/2033/3708/6655/1432/1386/1387/5747	41
37	Endothelial	hsa05120	Epithelial cell signaling in Helicobacter pylori infection	28/1338	70/8163	1.90372e-06	1.66704e-05	9.58632e-06	58494/5336/4233/50848/1839/5600/28964/4792/102/2920/7082/4067/3551/6868/5335/998/836/4790/10312/5879/3576/3725/23545/5599/5970/523/2921/1432	28
38	Endothelial	hsa04612	Antigen processing and presentation	30/1338	78/8163	2.18385e-06	1.86202e-05	1.07075e-05	972/3123/3122/3106/3133/3113/3115/3127/3105/567/3107/3119/3108/3117/3134/3109/6890/6891/4261/3111/1520/3118/6892/3312/5720/3304/3303/5721/821/3320	30
39	Endothelial	hsa04144	Endocytosis	69/1338	251/8163	4.54608e-06	3.77675e-05	2.17181e-05	3106/3133/3105/3107/7048/3134/50807/9267/64411/30844/26052/8766/408/116984/28964/5371/11059/79720/1601/857/23527/10095/3949/5338/868/163/3312/161/64750/9765/51100/10015/998/156/4734/1785/10097/10565/5878/116988/3304/3303/11021/5868/1213/382/829/81873/147179/29924/4087/830/10564/23325/867/3482/9798/9815/2060/51028/58533/9101/22905/30011/253725/8394/27131/387680/4088	69
40	Endothelial	hsa05235	PD-L1 expression and PD-1 checkpoint pathway in cancer	32/1338	89/8163	5.52006e-06	4.47125e-05	2.57118e-05	8503/5600/5530/4792/4773/3459/6774/3551/3716/3091/7099/5595/5335/27436/3845/4893/4615/4215/10000/4790/5533/5534/2353/4775/3460/3725/5291/6198/5970/4772/1457/1432	32
41	Endothelial	hsa04014	Ras signaling pathway	65/1338	235/8163	6.87913e-06	5.34968e-05	3.07633e-05	2321/2791/2113/8503/3791/10156/7010/1942/57186/7424/25780/5336/5155/4233/4301/5924/2324/5900/2114/3481/51365/9771/9462/27/6464/3551/4254/5899/5908/5863/8844/25759/5338/5062/5966/1969/5595/1435/5335/3845/4893/998/5898/10000/4790/8036/5878/29110/5868/5921/382/2787/253959/2782/5879/57148/5922/5291/6654/5599/5970/59345/55770/6655/11186	65
42	Endothelial	hsa05152	Tuberculosis	53/1338	180/8163	6.99336e-06	5.34968e-05	3.07633e-05	972/3123/3122/3113/3569/3115/3127/3119/3108/3117/3109/843/8877/4261/637/3111/5600/1520/3118/5530/7132/3459/10892/929/8844/3716/7099/5595/23365/4615/836/1054/8915/10000/4790/10312/5878/5533/5534/5868/3460/5289/317/23545/5599/1263/5970/3920/2033/3329/1432/1387/51135	53
43	Endothelial	hsa04662	B cell receptor signaling pathway	30/1338	82/8163	7.20909e-06	5.34968e-05	3.07633e-05	8519/8503/25780/5336/974/3635/5530/4792/4773/4067/3551/10892/5595/3845/4893/2932/8915/10000/4790/5533/5534/2353/4775/5879/3725/5291/6654/5970/4772/6655	30
44	Endothelial	hsa04370	VEGF signaling pathway	24/1338	59/8163	7.265e-06	5.34968e-05	3.07633e-05	8503/3791/5336/4846/8877/5829/5600/5530/4773/25759/5743/5595/5335/3845/4893/998/10000/5533/5534/5879/5291/1432/9261/5747	24
45	Endothelial	hsa04380	Osteoclast differentiation	41/1338	128/8163	8.20931e-06	5.9107e-05	3.39894e-05	7048/8503/5336/9021/5600/5468/5530/2534/4792/7132/4773/3459/2355/3551/3554/140885/10379/3716/5595/3455/1435/3726/4791/2354/10000/4790/5533/5534/2353/3727/5971/3460/5879/3725/3454/5291/5599/5970/4772/6773/1432	41
46	Endothelial	hsa05221	Acute myeloid leukemia	26/1338	67/8163	8.51905e-06	6.00037e-05	3.45051e-05	8503/1848/4609/6774/3551/5371/3728/929/5914/5595/862/3845/4893/673/10000/4790/6776/5291/6654/83439/6777/6198/5970/5292/7704/6655	26
47	Endothelial	hsa05222	Small cell lung cancer	32/1338	92/8163	1.22375e-05	8.43605e-05	4.85114e-05	3655/8503/3912/4609/4792/3673/3910/3909/3551/5925/1026/330/5743/3911/836/10000/4790/7157/51426/329/331/1282/3913/4149/1164/5291/1021/1017/317/5970/3915/5747	32
48	Endothelial	hsa04072	Phospholipase D signaling pathway	45/1338	148/8163	1.38761e-05	9.36637e-05	5.38612e-05	8503/196883/10161/10411/23236/9267/11069/5336/5155/554/8877/26052/5900/2534/6464/2149/8611/4254/8526/5899/8525/2185/25759/5338/5595/5335/8613/3845/5332/4893/160851/5898/1785/10000/382/3576/56894/5331/5291/6654/7249/10672/55326/6655/8394	45
49	Endothelial	hsa05211	Renal cell carcinoma	26/1338	69/8163	1.58459e-05	0.000103063	5.92663e-05	2113/8503/5155/4233/2034/2889/5908/1026/5062/3091/5595/1398/3845/4893/998/673/10000/54583/5879/3725/5291/6654/2033/6655/6921/1387	26
50	Endothelial	hsa04940	Type I diabetes mellitus	19/1338	43/8163	1.59048e-05	0.000103063	5.92663e-05	3123/3122/3106/3133/3113/3115/3127/3105/3107/3119/3108/3117/3134/3382/3109/5799/3111/3118/3329	19
51	Endothelial	hsa04360	Axon guidance	52/1338	182/8163	2.15765e-05	0.000137074	7.88243e-05	8829/8503/57556/1942/2050/5336/10501/4233/27289/3983/5362/1808/6405/5530/2534/1948/22885/659/1947/4773/64221/2771/6387/23380/4690/5062/2242/1969/5595/54910/23365/5335/3845/2043/4893/998/57522/2932/5533/5534/54434/3985/9723/2773/5921/4775/5879/5291/10627/64218/85464/5747	52
52	Endothelial	hsa04330	Notch signaling pathway	23/1338	59/8163	2.56536e-05	0.000159841	9.19166e-05	4855/4851/54567/28514/3714/4242/3955/8650/2648/151636/3280/6868/3065/7090/7089/51107/22938/2033/5663/9612/1387/7091/23385	23
53	Endothelial	hsa04520	Adherens junction	26/1338	71/8163	2.84838e-05	0.000172362	9.91164e-05	5787/7048/5797/4233/4301/5819/7525/10458/1500/2534/6615/1499/7082/51701/5595/1495/998/10163/5879/83439/8826/2033/1457/2241/1387/4088	26
54	Endothelial	hsa04919	Thyroid hormone signaling pathway	38/1338	121/8163	2.87269e-05	0.000172362	9.91164e-05	8503/4855/23236/4851/5336/476/4609/1499/2308/2648/3091/5595/8202/5335/3845/5332/4893/9882/2932/10000/483/7157/3065/23389/9862/9968/5331/9969/5291/7249/5469/1827/8648/2033/25942/9440/1387/9282	38
55	Endothelial	hsa04660	T cell receptor signaling pathway	34/1338	104/8163	2.96617e-05	0.000174734	0.000100481	8503/5600/5530/2534/4792/4773/3551/10892/868/4690/5062/5595/1326/5335/3845/4893/998/2932/8915/10000/4790/5533/5534/2353/4775/3725/5291/6654/5599/1739/5970/4772/6655/1432	34
56	Endothelial	hsa04151	PI3K-Akt signaling pathway	87/1338	354/8163	3.47419e-05	0.000201007	0.000115589	7450/2321/2791/3655/3569/8503/10161/3791/3691/3678/7010/3563/7148/1942/7424/4846/29941/5155/4233/2324/1440/3912/9223/6446/3481/4609/4170/3673/2149/3910/3909/11140/3551/4254/7531/3566/896/1026/5519/1969/3716/10018/3164/7099/5595/3455/1435/54541/3911/3845/4893/2932/9180/5525/10000/4790/5520/7157/5586/1282/2787/5585/1388/3913/5562/2782/5879/92579/3454/5291/6194/6654/7249/1021/7529/1017/6198/23239/59…	87
57	Endothelial	hsa05330	Allograft rejection	17/1338	38/8163	3.65315e-05	0.000207653	0.00011941	3123/3122/3106/3133/3113/3115/3127/3105/3107/3119/3108/3117/3134/3109/3111/3118/958	17
58	Endothelial	hsa05212	Pancreatic cancer	27/1338	76/8163	3.76161e-05	0.000210131	0.000120836	7048/8503/5900/6774/3551/5899/5925/1026/5338/3716/5595/3845/998/5898/673/10000/4790/7157/51426/5879/4087/5291/1021/6198/5599/5970/4088	27
59	Endothelial	hsa05165	Human papillomavirus infection	82/1338	331/8163	4.31322e-05	0.000236862	0.000136207	7450/3106/3133/3655/3105/3107/8503/4855/3134/3691/3678/7148/4851/4242/3955/5829/3912/9223/8322/3673/7132/3659/3910/1499/3909/3551/2308/5925/8323/896/1026/5519/5743/3280/10379/3716/5595/3455/1452/3911/3845/4893/998/4599/836/2932/5525/10000/4790/10312/5520/7157/3065/29110/10134/1282/3913/5610/3454/5291/6654/7249/1021/83439/1017/324/23545/6198/1739/5970/3915/2033/523/5663/6773/6655/7337/472/3680/233…	82
60	Endothelial	hsa05134	Legionellosis	22/1338	57/8163	4.5888e-05	0.000247795	0.000142494	3569/834/4792/2920/929/7099/3312/4671/840/4615/4791/836/1195/4790/3304/3303/29108/3576/317/5970/3329/2921	22
61	Endothelial	hsa04012	ErbB signaling pathway	29/1338	85/8163	4.66615e-05	0.000247841	0.000142521	8503/5336/1839/4609/27/6464/1026/25759/868/4690/5062/5595/1398/5335/3845/4893/2932/673/10000/6776/3725/5291/6654/6777/6198/5599/867/6655/5747	29
62	Endothelial	hsa04510	Focal adhesion	55/1338	201/8163	4.80584e-05	0.000248718	0.000143025	7450/2321/3655/8503/3791/3691/3678/2317/7148/7424/5155/4233/2324/5829/3912/29780/2534/3673/6464/3910/1499/2889/3909/5908/857/896/330/25759/5062/5595/1398/1793/3911/998/2932/673/5499/10000/1729/329/331/824/1282/3913/5879/3725/5291/6654/10627/5599/3915/6655/3680/8394/5747	55
63	Endothelial	hsa05140	Leishmaniasis	27/1338	77/8163	4.90206e-05	0.000248718	0.000143025	3123/3122/3113/3115/3127/3119/65108/3108/3117/3109/3111/5600/3118/4792/3459/5743/3716/7099/5595/4615/4790/2353/3460/3725/5970/1432/51135	27
64	Endothelial	hsa05321	Inflammatory bowel disease	24/1338	65/8163	4.91295e-05	0.000248718	0.000143025	3123/3122/3113/3569/3115/3127/3119/3108/3117/3109/3111/3118/3459/6774/3566/7099/6095/4790/3460/3725/4087/5970/4772/4088	24
65	Endothelial	hsa04062	Chemokine signaling pathway	53/1338	192/8163	5.0809e-05	0.000253263	0.000145639	2791/6358/8503/196883/23236/9844/5336/408/5829/4792/6464/2920/6774/4067/3551/5908/2776/2185/2771/6387/25759/5595/1398/5335/3845/5332/4893/998/156/2932/673/6376/10000/4790/2773/2787/2782/5879/3576/5331/5291/6654/6777/6351/5970/59345/9560/6773/6655/6349/2921/6347/5747	53
66	Endothelial	hsa05231	Choline metabolism in cancer	32/1338	98/8163	5.1798e-05	0.000254281	0.000146224	8503/5155/5900/8611/8526/8525/57153/5338/1119/3091/5595/5335/8613/3845/56261/4893/160851/10000/10163/6667/2353/10434/5879/3725/5291/6654/7249/6198/5599/5130/6655/8394	32
67	Endothelial	hsa05418	Fluid shear stress and atherosclerosis	41/1338	139/8163	7.16119e-05	0.000346302	0.000199141	5175/5327/6401/7056/1003/3383/8503/4258/3791/4846/5155/5600/10365/7132/659/1499/7412/3551/3554/857/445/1906/10000/4790/4208/7157/2353/5562/1843/5879/3725/5291/4780/5599/5970/1728/3320/92/1432/6347/5747	41
68	Endothelial	hsa04015	Rap1 signaling pathway	56/1338	210/8163	8.91664e-05	0.000424852	0.000244311	2321/8503/196883/3791/10411/7010/23236/1942/9732/7424/25780/11069/64411/5155/4233/4301/2324/5900/3397/9002/9223/5600/9771/25865/1500/2149/1499/2889/4254/5899/5908/2776/2771/23683/1969/9693/5595/1435/1398/5335/3845/5332/4893/998/6494/5898/673/10000/2773/5879/5331/5291/889/260425/1432/51466	56
69	Endothelial	hsa04666	Fc gamma R-mediated phagocytosis	31/1338	97/8163	0.000106327	0.000499274	0.000287107	65108/8503/50807/5336/8877/3635/4651/8611/4067/4082/10095/5338/5581/5595/1398/5335/1793/8613/998/1785/10000/10097/2934/10163/3985/382/81873/5879/5291/6198/8394	31
70	Endothelial	hsa04071	Sphingolipid signaling pathway	36/1338	119/8163	0.000110121	0.000509704	0.000293105	1901/8503/23236/9517/4846/8877/624/637/5600/2534/7132/2776/2771/5519/5338/5581/5595/3845/5332/4893/5525/10000/4790/5520/7157/2773/259230/5879/5331/5291/10672/5599/5970/10558/1432/8439	36
71	Endothelial	hsa01522	Endocrine resistance	31/1338	98/8163	0.000131557	0.000600342	0.000345226	8503/4855/196883/4851/54567/28514/3714/1839/5600/6464/5925/1026/25759/5595/8202/3845/4893/673/10000/7157/6667/2353/3725/5291/6654/6198/5599/5469/6655/1432/5747	31
72	Endothelial	hsa04926	Relaxin signaling pathway	38/1338	129/8163	0.000134092	0.000603414	0.000346992	2791/7048/1910/8503/196883/23236/7424/4846/408/5600/4792/6464/2771/25759/5595/1906/3845/5332/4893/10000/4790/2353/2773/1282/2787/1388/2782/3725/5331/4087/5291/6654/5599/5970/59345/6655/1432/1386	38
73	Endothelial	hsa05100	Bacterial invasion of epithelial cells	26/1338	77/8163	0.000137935	0.000612205	0.000352048	8503/3678/9844/4233/26052/5829/6464/1499/23607/857/10095/25759/1398/1793/1495/998/1785/10097/10163/3059/1213/81873/5879/5291/867/5747	26
74	Endothelial	hsa05205	Proteoglycans in cancer	54/1338	205/8163	0.000167266	0.000724833	0.000416815	8503/3791/3678/2317/5336/4233/3339/1655/5829/3481/1839/5600/4609/3709/5962/8322/3710/3673/1499/6774/8323/4478/857/1026/7078/9138/3091/7099/5595/23365/5335/3845/4893/998/836/673/5499/10000/7157/3059/5879/27250/4087/5291/6194/6654/6198/867/8826/5329/3708/6655/1432/5747	54
75	Endothelial	hsa05332	Graft-versus-host disease	17/1338	42/8163	0.000167786	0.000724833	0.000416815	3123/3122/3106/3133/3113/3569/3115/3127/3105/3107/3119/3108/3117/3134/3109/3111/3118	17
76	Endothelial	hsa04917	Prolactin signaling pathway	24/1338	70/8163	0.000189018	0.000802443	0.000461444	8503/8835/9021/5600/6464/3659/6774/25759/5595/3845/4893/2932/10000/4790/2353/6776/5291/6654/6777/122809/5599/5970/6655/1432	24
77	Endothelial	hsa04068	FoxO signaling pathway	38/1338	131/8163	0.000190704	0.000802443	0.000461444	3569/8743/7048/1901/8503/6446/5600/10365/6774/3551/2308/51701/1026/10018/5595/3845/4893/673/6648/10000/3276/5562/92579/5291/6654/1017/5599/1263/2033/51422/7874/1454/6655/472/1432/1387/5564/4088	38
78	Endothelial	hsa03015	mRNA surveillance pathway	30/1338	97/8163	0.00026191	0.00108793	0.000625616	2521/5519/51585/23049/9939/7919/22985/5499/26986/5525/5520/9887/5411/10914/26019/10921/26528/80335/23293/11051/2935/10250/10482/29894/23283/29107/65110/53981/2107/8189	30
79	Endothelial	hsa04928	Parathyroid hormone synthesis, secretion and action	32/1338	106/8163	0.000271444	0.00111327	0.000640182	196883/23236/408/1839/3709/3710/9365/2776/2771/1958/1026/4929/4041/5338/9138/5142/5595/5332/11214/673/4208/6667/2353/2773/1388/3727/5331/10672/2767/3708/1386/5144	32
80	Endothelial	hsa04145	Phagosome	42/1338	152/8163	0.000290297	0.0011757	0.000676086	3123/3122/3106/3133/3113/3115/3127/3105/3107/3119/3108/3117/3134/3678/949/3109/6890/6891/948/3111/1520/3118/3673/929/1778/7099/10312/83547/5878/5868/5879/84617/821/23673/200576/5289/23545/10383/3920/203068/523/79659	42
81	Endothelial	hsa04371	Apelin signaling pathway	39/1338	139/8163	0.000336591	0.00134637	0.000774226	5327/2791/196883/23236/187/4846/8877/3709/3710/10365/2776/2771/1958/81631/5581/5595/3845/5332/4893/10000/4208/2773/2787/5562/2782/5331/4087/6194/30849/10672/5289/6546/6198/59345/51422/3708/7019/5564/4088	39
82	Endothelial	hsa04620	Toll-like receptor signaling pathway	31/1338	104/8163	0.000430124	0.00169951	0.000977303	3569/8503/5600/4792/23643/3551/929/3665/7099/5595/3455/1326/4615/958/10000/4790/2353/29110/5879/3576/8737/3725/3454/5291/6351/5599/5970/9560/6349/1432/51135	31
83	Endothelial	hsa05323	Rheumatoid arthritis	28/1338	93/8163	0.000671485	0.00262122	0.00150733	3123/3122/3113/2321/3569/3115/3127/3119/3383/3108/3117/7010/3109/3111/3118/2920/6387/7099/1435/10312/2353/3576/3725/23545/523/6349/2921/6347	28
84	Endothelial	hsa05225	Hepatocellular carcinoma	44/1338	168/8163	0.000741683	0.00286078	0.00164509	7048/8503/4258/5336/4233/3481/4609/8322/6464/1499/5925/8323/1026/25759/4041/5595/57492/1452/5335/3845/6595/4893/2932/673/10000/7157/51426/6597/4087/5291/6654/1021/83439/324/8289/6198/6605/4780/1728/6655/196528/55193/6599/4088	44
85	Endothelial	hsa04650	Natural killer cell mediated cytotoxicity	36/1338	131/8163	0.000854436	0.00325691	0.00187288	3106/3133/8743/3105/3107/3383/3384/8503/5336/8797/6452/637/5530/2534/6464/4773/3459/8795/2185/25759/5595/3455/5335/3845/4893/836/673/5533/5534/3460/5879/3454/5291/6654/4772/6655	36
86	Endothelial	hsa04120	Ubiquitin mediated proteolysis	38/1338	142/8163	0.00107611	0.00405417	0.00233134	9021/4214/5371/11059/330/868/4281/64750/8924/57448/7323/9320/51465/4734/8925/329/996/331/55236/8452/9063/9690/26091/55585/51366/64326/7316/9246/867/7327/7318/6921/7337/10075/9354/8451/55120/89910	38
87	Endothelial	hsa04670	Leukocyte transendothelial migration	32/1338	114/8163	0.00110159	0.00409629	0.00235557	5175/7122/1003/90952/3383/8503/58494/10411/11069/5336/4301/50848/5829/5600/1500/1499/7412/5908/4478/2185/2771/6387/5335/1495/998/6494/2773/5879/5291/10627/1432/5747	32
88	Endothelial	hsa05224	Breast cancer	39/1338	147/8163	0.00111257	0.00409629	0.00235557	8503/4855/4851/54567/28514/3714/2324/4609/8322/6464/1499/5925/8323/1026/25759/4041/3280/5595/8202/1452/3845/4893/4791/2932/673/10000/7157/51426/6667/2353/3725/5291/6654/1021/83439/324/6198/8648/6655	39
89	Endothelial	hsa05320	Autoimmune thyroid disease	18/1338	53/8163	0.00132227	0.00481365	0.00276809	3123/3122/3106/3133/3113/3115/3127/3105/3107/3119/3108/3117/3134/3109/7173/3111/3118/958	18
90	Endothelial	hsa05216	Thyroid cancer	14/1338	37/8163	0.00137644	0.00495517	0.00284946	7170/4609/5468/1499/1026/5595/3845/4893/673/7157/51426/7175/83439/8031	14
91	Endothelial	hsa05146	Amoebiasis	29/1338	102/8163	0.00148755	0.00529632	0.00304564	3569/8503/23236/3912/3910/2920/3909/3554/2776/929/7099/5269/3911/5332/836/5272/4790/5878/5868/1282/3913/3576/5331/5291/2767/5970/3915/2921/5747	29
92	Endothelial	hsa04720	Long-term potentiation	21/1338	67/8163	0.00174608	0.00614924	0.00353611	10411/23236/3709/5530/3710/6197/6196/5908/2776/5595/3845/5332/4893/673/5499/5533/5534/5331/2033/3708/1387	21
93	Endothelial	hsa05133	Pertussis	23/1338	76/8163	0.00182009	0.00634096	0.00364636	3569/3678/5600/834/3659/23643/2771/929/7099/5595/840/4615/836/4790/2353/2773/29108/3576/3725/5599/5970/1432/51135	23
94	Endothelial	hsa04931	Insulin resistance	30/1338	108/8163	0.00185797	0.00639479	0.00367731	3569/8503/4846/9021/948/32/4792/6197/7132/6196/6774/3551/2308/5581/1374/9882/2932/5499/10000/22877/4790/5562/92579/5291/10724/6198/5599/5970/51422/5564	30
95	Endothelial	hsa04623	Cytosolic DNA-sensing pathway	20/1338	63/8163	0.00187501	0.00639479	0.00367731	3569/90865/834/4792/3551/3665/103/23586/115004/4790/29110/29108/8737/6351/5441/5437/5970/9560/9533/661	20
96	Endothelial	hsa05223	Non-small cell lung cancer	22/1338	72/8163	0.00197833	0.00667687	0.00383953	8503/5336/4233/6774/5925/1026/5595/5335/27436/3845/4893/673/10000/7157/51426/6776/5291/6654/1021/6777/6655/11186	22
97	Endothelial	hsa04910	Insulin signaling pathway	36/1338	137/8163	0.00203137	0.00678518	0.00390181	8503/8835/9021/32/6464/2889/3551/10211/2308/5257/25759/868/2872/5595/1398/3845/4893/2932/673/5499/10000/5575/5562/92579/5291/6194/6654/7249/6198/122809/5599/867/51422/6655/5564/5576	36
98	Endothelial	hsa04915	Estrogen signaling pathway	36/1338	138/8163	0.00232553	0.00768849	0.00442126	8503/196883/23236/4846/1839/3709/3710/6464/3875/2776/2771/25759/5914/5595/2289/8202/3312/3845/5332/4893/10000/6667/3304/2353/3303/2773/1388/3725/5331/5291/6654/8648/3320/3708/6655/1386	36
99	Endothelial	hsa05310	Asthma	12/1338	31/8163	0.00239038	0.00782305	0.00449864	3123/3122/3113/3115/3127/3119/3108/3117/3109/3111/3118/958	12
100	Endothelial	hsa04920	Adipocytokine signaling pathway	21/1338	69/8163	0.00261611	0.0084762	0.00487423	7133/51703/9021/948/32/3953/4792/7132/6774/3551/79602/1374/10000/4790/5562/92579/2182/5599/5970/51422/5564	21
101	Endothelial	hsa04070	Phosphatidylinositol signaling system	27/1338	97/8163	0.00296805	0.00942793	0.00542152	8503/23236/5336/5286/3709/3635/5287/3710/3628/80271/3707/8526/8525/5335/5332/160851/4534/8867/5331/5291/200576/5289/9107/3631/51447/3708/8394	27
102	Endothelial	hsa05215	Prostate cancer	27/1338	97/8163	0.00296805	0.00942793	0.00542152	5327/8503/5155/4792/1499/3551/2308/5925/1026/5595/3845/2078/4893/2932/673/10000/4790/7157/5291/6654/83439/1017/5970/2033/3320/6655/1387	27
103	Endothelial	hsa01521	EGFR tyrosine kinase inhibitor resistance	23/1338	79/8163	0.0031696	0.00997038	0.00573345	3569/8503/3791/5336/5155/4233/6464/6774/25759/3716/10018/5595/5335/3845/4893/2932/673/10000/5291/6194/6654/6198/6655	23
104	Endothelial	hsa04215	Apoptosis - multiple species	12/1338	32/8163	0.00326317	0.0101564	0.0058404	637/7132/330/5366/10018/57448/840/836/329/331/317/5599	12
105	Endothelial	hsa04912	GnRH signaling pathway	26/1338	93/8163	0.00329141	0.0101564	0.0058404	196883/23236/1839/5600/3709/4214/3710/2776/2185/1958/5338/5595/3845/5332/4893/998/4215/3725/5331/6654/2767/5599/3708/6655/4216/1432	26
106	Endothelial	hsa04211	Longevity regulating pathway	25/1338	89/8163	0.00364812	0.0111509	0.00641229	8503/196883/5468/9365/2308/79602/3845/4893/6648/10000/4790/7157/79813/1388/5562/5291/7249/6198/5970/9821/51422/143686/1386/5564/26060	25
107	Endothelial	hsa04672	Intestinal immune network for IgA production	16/1338	49/8163	0.00378084	0.0114485	0.00658345	3123/3122/3113/3569/3115/3127/3119/3108/3117/3109/3111/3118/3601/6387/4055/958	16
108	Endothelial	hsa04657	IL-17 signaling pathway	26/1338	94/8163	0.00385758	0.0115727	0.00665489	3569/1440/5600/4792/2920/3551/7128/5743/5595/29761/836/2932/2354/4790/2353/29110/10758/3727/3576/3725/5599/5970/3320/2921/1432/6347	26
109	Endothelial	hsa04630	JAK-STAT signaling pathway	40/1338	162/8163	0.00402551	0.0119657	0.00688088	3569/3977/8503/8835/3563/5155/9021/1440/3572/4609/1439/4170/3953/9466/3459/3601/6774/3566/896/1026/10379/3716/3455/9180/10000/6776/3460/9063/3454/5291/6654/6777/122809/5292/2033/6773/6655/5771/1387/3597	40
110	Endothelial	hsa05213	Endometrial cancer	18/1338	58/8163	0.00408114	0.0120208	0.00691255	8503/4609/1499/1026/5595/3845/1495/4893/2932/673/10000/7157/51426/5291/6654/83439/324/6655	18
111	Endothelial	hsa05219	Bladder cancer	14/1338	41/8163	0.00418023	0.0122017	0.0070166	1839/4609/1890/1612/5925/1026/5595/3845/4893/673/7157/9252/3576/11186	14
112	Endothelial	hsa03250	Viral life cycle - HIV-1	19/1338	63/8163	0.00458068	0.0132512	0.00762011	684/25939/2648/636/10015/4599/5045/904/27125/5903/256987/1025/2033/9972/4300/905/7514/1387/10955	19
113	Endothelial	hsa04550	Signaling pathways regulating pluripotency of stem cells	35/1338	143/8163	0.0079019	0.0226568	0.0130288	3977/8503/3625/9314/3572/3397/5600/4609/4086/8322/659/1499/6774/7994/8323/7703/3716/5595/6498/3845/4893/3720/10336/2932/10000/4087/5291/324/56916/55183/92/4090/1432/3399/4088	35
114	Endothelial	hsa04640	Hematopoietic cell lineage	26/1338	99/8163	0.00805987	0.022907	0.0131726	3123/3122/3113/3655/3569/3115/3127/947/3119/3108/3117/3678/3563/3109/1440/948/3111/966/3118/3673/4254/3554/3566/929/1435/1604	26
115	Endothelial	hsa04611	Platelet activation	31/1338	124/8163	0.00873841	0.0245901	0.0141405	7450/8503/196883/23236/5336/4846/9002/84876/5600/3709/3710/2534/3673/2149/4067/5908/2776/2771/9138/5595/23365/5332/5499/10000/2773/5331/5291/10672/10627/3708/1432	31
116	Endothelial	hsa04961	Endocrine and other factor-regulated calcium reabsorption	16/1338	53/8163	0.00880385	0.0245901	0.0141405	23236/26052/8766/624/476/9365/490/2776/163/161/5332/1785/483/1213/5331/6546	16
117	Endothelial	hsa04141	Protein processing in endoplasmic reticulum	40/1338	171/8163	0.0105398	0.0291871	0.016784	3301/6238/4121/6184/3312/7323/51465/22926/4287/3304/3303/80267/824/10134/23471/1388/10808/55768/3998/23645/55741/51726/5610/23190/5589/440275/821/64215/10427/4780/5599/7327/7095/9601/3320/56886/9709/9695/3337/10802	40
118	Endothelial	hsa04810	Regulation of actin cytoskeleton	49/1338	218/8163	0.0109896	0.0301747	0.0173519	3655/8503/3691/3678/5155/624/5829/5962/10458/28964/3673/2149/4478/10095/6387/9138/5062/5595/23365/1398/1793/3845/221178/4893/998/673/5499/1729/10097/2934/54434/10163/3985/81873/5879/8874/5291/200576/6654/10672/10627/324/8826/6655/23191/3680/85464/8394/5747	49
119	Endothelial	hsa05144	Malaria	15/1338	50/8163	0.0117055	0.0316075	0.0181759	2532/5175/6401/3569/3383/6403/4233/1440/948/7412/7099/4615/958/3576/6347	15
120	Endothelial	hsa00562	Inositol phosphate metabolism	20/1338	73/8163	0.0117065	0.0316075	0.0181759	23236/5336/5286/3635/5287/3628/80271/3707/5335/5332/4534/8867/5331/5291/200576/5289/51763/9107/3631/8394	20
121	Endothelial	hsa04922	Glucagon signaling pathway	27/1338	107/8163	0.0121763	0.0326042	0.018749	23236/32/3709/5530/3710/150094/2308/2776/5257/23235/1374/5332/10000/5533/5534/3276/5562/92579/5331/5531/55671/2033/51422/3708/1386/1387/5564	27
122	Endothelial	hsa04936	Alcoholic liver disease	34/1338	142/8163	0.0123044	0.0326771	0.0187909	3569/32/5600/4792/7132/2920/1499/23643/3551/2308/6434/929/79602/1374/7099/4615/836/2932/10000/4790/29110/29896/5562/3576/8737/223/83439/5599/5970/51422/2921/1432/5564/51135	34
123	Endothelial	hsa00564	Glycerophospholipid metabolism	25/1338	98/8163	0.0134791	0.0355059	0.0204176	51365/8611/254531/8526/8525/54947/5338/1119/84803/2820/8613/56261/160851/9926/10434/10162/79888/56894/55500/9489/55326/5130/10390/137964/11313	25
124	Endothelial	hsa04730	Long-term depression	17/1338	60/8163	0.0137506	0.035929	0.0206609	23236/3709/3710/4067/2776/2771/5519/5595/3845/5332/4893/673/2773/5331/10672/2767/3708	17
125	Endothelial	hsa03018	RNA degradation	21/1338	79/8163	0.0141297	0.0366242	0.0210607	246175/7832/694/167227/22803/26986/9924/54464/22894/255967/9337/87178/23019/118460/55802/219988/3329/170506/11044/51691/9652	21
126	Endothelial	hsa04066	HIF-1 signaling pathway	27/1338	109/8163	0.015538	0.0399549	0.022976	2321/3569/8503/7010/5336/4846/3459/6774/1026/2872/3091/7099/5595/1906/5335/4055/10000/4790/54583/3460/5291/6194/6198/5970/2033/6921/1387	27
127	Endothelial	hsa04710	Circadian rhythm	11/1338	34/8163	0.016363	0.0417449	0.0240053	8553/1453/6095/5187/5562/1407/51422/1454/8863/9575/5564	11
128	Endothelial	hsa00533	Glycosaminoglycan biosynthesis - keratan sulfate	6/1338	14/8163	0.0175444	0.0444094	0.0255375	2683/10678/6482/6483/2530/8703	6
129	VSMC	hsa05415	Diabetic cardiomyopathy	82/879	203/8163	8.37955e-29	2.69822e-26	1.94935e-26	5350/5500/1278/291/4697/1281/1350/1277/7381/2597/1509/4725/4714/4713/1345/7417/1347/51079/1346/1351/10975/51660/56901/1340/1337/518/9167/29796/4716/1349/27089/54539/818/126328/6262/513/5295/2673/5165/1329/5602/25874/3667/4717/7388/4698/4724/5164/7384/4706/4710/4313/4728/539/7046/10476/6513/498/514/6390/522/4715/5728/4694/4707/374291/207/1537/4709/7419/7386/4708/4726/2539/55967/516/4718/7043/4723/…	82
130	VSMC	hsa05012	Parkinson disease	94/879	266/8163	1.31985e-27	2.12496e-25	1.53519e-25	291/4697/805/6647/1350/11315/7381/4725/4714/4713/808/1345/7417/1347/51079/1346/1351/10975/56901/1340/111/1337/518/9167/29796/4716/25800/5694/1349/27089/4129/54539/818/126328/7846/6233/513/1329/5602/4717/7388/5689/7345/4698/4724/5714/7384/4706/4710/3799/4728/539/10476/2778/5705/498/801/514/6390/5715/522/84790/91252/4715/4694/4707/7311/5567/374291/5702/5710/4217/1537/9627/4709/7419/7314/7386/4708/4…	94
131	VSMC	hsa04714	Thermogenesis	82/879	232/8163	3.71654e-24	3.28557e-22	2.37369e-22	5592/4697/60/1350/7381/4725/4714/4713/1345/1347/51079/1346/6604/1351/10975/84987/56901/1340/111/1337/518/10632/9167/29796/4716/1349/63976/27089/54539/126328/284184/71/521/513/116228/1329/4717/7388/4698/64764/4724/7384/4706/4710/91942/4728/539/10476/2778/493753/109/498/514/6390/522/28958/10488/4715/4694/2260/4707/5563/5567/374291/4217/1537/4709/2180/7386/4708/4726/55967/5565/516/4718/4723/9551/115…	82
132	VSMC	hsa00190	Oxidative phosphorylation	60/879	134/8163	4.08146e-24	3.28557e-22	2.37369e-22	4697/1350/7381/4725/4714/4713/1345/1347/51079/1346/1351/10975/56901/1340/1337/518/10632/9167/29796/4716/1349/27089/54539/126328/155066/521/513/1329/4717/7388/4698/4724/7384/4706/4710/4728/539/10476/498/514/6390/522/4715/4694/4707/374291/1537/9550/4709/7386/4708/4726/55967/529/516/4718/4723/9551/4712/4729	60
133	VSMC	hsa05208	Chemical carcinogenesis - reactive oxygen species	78/879	223/8163	1.10387e-22	7.10891e-21	5.13589e-21	291/4697/6647/1350/4259/7381/4725/4714/4713/2947/1345/7417/1347/51079/1346/1351/10975/873/56901/50507/1340/1956/1337/518/9167/29796/4716/1349/27089/54539/126328/513/5295/1329/5602/4717/7388/4698/1646/4724/7384/4706/4710/4728/539/10476/498/514/6390/522/9446/572/4715/5728/4694/4707/374291/4217/207/1537/653689/4709/7419/7386/4708/4726/55967/516/2948/4718/4723/52/4712/4729/4257/2941/3265/10327	78
134	VSMC	hsa05016	Huntington disease	94/879	306/8163	1.77182e-22	9.50879e-21	6.8697e-21	291/4697/6647/1350/2891/7381/4725/4714/4713/1345/7417/1347/2878/51079/1346/1351/10975/56901/1340/1212/1337/518/9167/29796/4716/5694/1349/27089/54539/126328/7846/513/11258/1329/5602/5439/4717/7388/5689/4698/64764/4724/5714/5434/7384/4706/4710/3799/4728/539/10476/5705/5438/10540/5432/498/514/5435/6390/5715/522/84790/10488/4715/4694/4707/5440/374291/5702/5710/4217/1537/27113/10671/4709/7419/7386/470…	94
135	VSMC	hsa05020	Prion disease	86/879	273/8163	1.99797e-21	9.19067e-20	6.63987e-20	291/4697/6647/1350/7381/4725/4714/4713/1345/7417/1347/51079/1346/5621/1351/3306/10975/56901/1340/1337/518/9167/29796/4716/5694/1349/27089/54539/126328/7846/6262/513/5295/1329/5602/4717/7388/5689/4698/64764/4724/5714/7384/4706/4710/3799/4728/539/10476/5705/498/514/6390/5715/522/84790/572/10488/4715/4694/4707/775/5567/374291/5702/5710/1537/4709/7419/7386/4708/4726/1649/5688/55967/516/4718/5695/4723…	86
136	VSMC	hsa05014	Amyotrophic lateral sclerosis	100/879	364/8163	6.8555e-20	2.75934e-18	1.99351e-18	5217/4697/60/6647/1350/2891/7381/4725/4714/4713/1345/1347/2878/51079/1346/283/1351/10975/400916/56901/1340/5216/1337/518/2066/9167/29796/4716/5694/1349/27089/54539/126328/7846/71/513/11258/1329/4717/7388/5689/4698/4724/5714/7384/596/4706/4710/3799/4728/539/10476/5705/10540/498/514/310/6390/5715/522/84790/572/10133/4715/4694/4707/10280/374291/5702/5710/4217/1537/84557/10671/25978/4709/7386/4708/47…	100
137	VSMC	hsa04932	Non-alcoholic fatty liver disease	57/879	155/8163	5.27194e-18	1.81743e-16	1.31302e-16	4697/1350/7381/8660/4725/4714/4713/1345/1347/51079/1346/1351/10975/56901/1340/1337/9167/29796/4716/1349/27089/54539/126328/5295/1329/5602/3667/4717/7388/4698/4724/7384/4706/4710/4728/6390/4715/4694/4707/5563/374291/4217/207/1537/4709/7386/4708/4726/1649/355/55967/5565/4718/4723/4712/4729/468	57
138	VSMC	hsa05022	Pathways of neurodegeneration - multiple diseases	115/879	476/8163	5.6442e-18	1.81743e-16	1.31302e-16	291/4697/805/6647/1350/11315/2891/7381/4725/4714/4713/808/1345/7417/1347/2878/51079/1346/5621/1351/10975/8321/56901/50507/1340/1337/518/9167/29796/4716/5694/3028/1349/27089/54539/818/126328/7846/6233/6262/513/11258/1329/5602/4717/7388/8324/5689/7345/4698/4724/5714/7384/596/4706/4710/3799/4728/539/10476/5705/10540/498/801/514/6390/5715/522/84790/572/10133/4715/4694/4707/10280/775/7311/374291/5702/…	115
139	VSMC	hsa05010	Alzheimer disease	98/879	384/8163	4.26195e-17	1.24759e-15	9.01332e-16	4035/291/4697/805/1350/7381/2597/8660/4725/4714/4713/808/1345/7417/1347/51079/1346/1351/10975/8321/56901/50507/1340/1337/518/9167/29796/4716/25800/5694/3028/1349/27089/54539/126328/7846/513/5295/1329/5602/3667/4717/7388/8324/5689/4698/4724/5714/7384/4706/4710/3799/4728/539/10476/5705/498/801/514/6390/5715/522/84790/572/91252/4715/4694/4707/775/374291/5702/5710/4217/207/1537/4709/7419/7386/4708/47…	98
140	VSMC	hsa03010	Ribosome	47/879	158/8163	3.27895e-11	8.79851e-10	6.35655e-10	6176/51065/9045/64968/6166/2197/6147/6144/51187/6217/64981/6233/219927/124995/6230/6138/6204/6150/55052/6143/4736/9553/6133/23521/6142/29074/51069/54460/7311/6193/6171/6128/6125/6141/6205/6152/6223/6207/6228/11222/64979/6231/6191/6129/51318/28998/6132	47
141	VSMC	hsa04510	Focal adhesion	50/879	201/8163	7.5527e-09	1.87074e-07	1.35154e-07	10398/8516/4638/4660/1292/5500/1278/2316/60/3611/2335/1291/3693/7423/7058/1277/5159/56034/7094/3688/5154/3679/22801/4659/5156/1293/7414/894/1956/87/71/2064/7057/5295/5602/1298/6093/596/1287/7791/3685/572/5728/207/1284/3675/81/55742/9475/3265	50
142	VSMC	hsa05414	Dilated cardiomyopathy	30/879	96/8163	3.59963e-08	8.27914e-07	5.98134e-07	7169/5350/7168/8516/6442/60/1756/3693/6443/3688/70/3679/22801/111/6444/6262/71/1674/2778/2010/109/3685/781/775/5567/3675/7043/115/112/488	30
143	VSMC	hsa04260	Cardiac muscle contraction	28/879	87/8163	5.05632e-08	1.08542e-06	7.84174e-07	7169/7168/1350/7381/70/1345/481/1347/1346/1351/10975/1340/1337/477/845/9167/29796/1349/27089/6262/1329/7388/7384/781/775/1537/7386/488	28
144	VSMC	hsa04723	Retrograde endocannabinoid signaling	37/879	148/8163	6.03454e-07	1.21445e-05	8.7739e-06	4697/2891/4725/4714/4713/51079/56901/111/4716/54539/126328/5602/4717/4698/4724/4706/4710/4728/55970/109/4715/4694/4707/775/5567/374291/4709/4708/10681/4726/55967/4718/4723/115/4712/4729/112	37
145	VSMC	hsa00620	Pyruvate metabolism	18/879	47/8163	7.01064e-07	1.3279e-05	9.5935e-06	128/217/3945/125/219/4190/5315/9380/4191/3029/39/224/2739/3939/38/2271/501/10327	18
146	VSMC	hsa04270	Vascular smooth muscle contraction	34/879	134/8163	1.19503e-06	2.13778e-05	1.54446e-05	59/4629/10398/800/10267/94274/4628/4638/4637/4660/5592/5500/3778/805/3779/808/72/2982/4659/5739/111/1909/2983/6093/2778/109/801/775/5567/140465/115/81579/9475/112	34
147	VSMC	hsa04022	cGMP-PKG signaling pathway	39/879	167/8163	1.92569e-06	3.26353e-05	2.35777e-05	10398/5350/4638/5592/5500/8654/3778/291/805/3779/8660/808/481/7417/152/2982/5139/4659/111/1909/477/3764/3667/64764/2983/6093/5997/109/801/572/10488/775/207/7419/115/9475/112/468/488	39
148	VSMC	hsa04810	Regulation of actin cytoskeleton	46/879	218/8163	4.74444e-06	7.63855e-05	5.51853e-05	4629/10398/8516/4628/4638/4660/5500/5217/60/2335/6237/3693/5159/56034/3688/5154/1073/3679/22801/4659/5156/7414/1902/1956/5216/87/26999/55740/71/7114/2252/5295/6093/55845/55970/10109/3685/2260/8976/10552/3675/10093/81/2247/9475/3265	46
149	VSMC	hsa05410	Hypertrophic cardiomyopathy	25/879	90/8163	5.50328e-06	8.43836e-05	6.09636e-05	7169/7168/8516/6442/60/1756/3693/6443/3688/70/3679/22801/6444/6262/71/1674/2010/3685/5563/781/775/3675/5565/7043/488	25
150	VSMC	hsa01200	Carbon metabolism	29/879	115/8163	8.23552e-06	0.000120538	8.70838e-05	128/2098/2597/26227/4190/5223/9104/2023/5315/6888/3421/1892/2026/2653/230/8803/4191/4329/6390/39/7086/5213/226/2539/38/7167/2271/84693/8801	29
151	VSMC	hsa00010	Glycolysis / Gluconeogenesis	20/879	67/8163	1.47831e-05	0.000206964	0.000149523	128/217/2597/3945/125/219/5236/5223/2023/5315/2026/230/224/5213/226/3939/130589/7167/501/10327	20
152	VSMC	hsa00071	Fatty acid degradation	15/879	43/8163	2.23576e-05	0.000299965	0.000216712	128/217/125/219/33/3033/1892/1632/39/224/2639/2180/38/30/501	15
153	VSMC	hsa05205	Proteoglycans in cancer	42/879	205/8163	2.59633e-05	0.000334407	0.000241595	4660/967/5500/6383/1278/2316/960/60/2335/6237/3693/1277/3316/3688/7291/4659/6385/8321/1956/2066/2719/2817/818/71/2064/7057/5295/60495/8324/6093/4313/3685/2260/5567/207/355/2247/51196/9475/2017/1634/3265	42
154	VSMC	hsa04962	Vasopressin-regulated water reabsorption	15/879	44/8163	3.05874e-05	0.000378813	0.000273676	8655/64764/2778/10540/109/10488/1780/5567/140735/6844/10671/5869/9230/115/112	15
155	VSMC	hsa04512	ECM-receptor interaction	23/879	88/8163	3.7993e-05	0.000453102	0.000327347	8516/1292/1278/960/2335/1291/3693/7058/1277/255743/3688/3679/22801/1293/6385/7057/9900/1298/1287/3685/961/1284/3675	23
156	VSMC	hsa05412	Arrhythmogenic right ventricular cardiomyopathy	20/879	77/8163	0.000131898	0.00151683	0.00109584	8516/6442/60/1756/3693/6443/3688/3679/22801/1000/6444/6262/71/1674/2010/3685/781/775/3675/488	20
157	VSMC	hsa04921	Oxytocin signaling pathway	32/879	154/8163	0.000177034	0.00196569	0.00142013	10398/4638/4637/4660/5500/805/60/808/2982/4659/111/1956/818/6262/71/2983/6093/2778/5997/109/801/5563/781/775/5567/140465/5565/115/9475/112/8536/3265	32
158	VSMC	hsa00480	Glutathione metabolism	16/879	57/8163	0.000232718	0.00249784	0.00180459	2950/2879/4259/2947/6611/2878/9588/9446/2686/653689/2539/2948/493869/6723/4257/2941	16
159	VSMC	hsa05418	Fluid shear stress and atherosclerosis	29/879	139/8163	0.000326592	0.00339234	0.00245082	2950/6383/805/60/4259/5154/2947/808/6385/658/657/2817/71/5295/5602/6613/596/4313/801/9446/3685/5563/4217/207/653689/2948/8878/4257/2941	29
160	VSMC	hsa04137	Mitophagy - animal	18/879	72/8163	0.000469105	0.00459124	0.00331698	6237/54543/665/6233/51024/5602/4286/11337/11345/10133/7311/84557/8887/7314/664/8878/468/3265	18
161	VSMC	hsa04530	Tight junction	33/879	169/8163	0.000470531	0.00459124	0.00331698	4629/10398/4628/4637/60/3688/5521/87/7846/71/2064/5602/6093/1741/10207/84952/10109/84790/11346/5563/5516/5567/4217/140465/83700/10552/10093/81/5565/861/9475/2017/56288	33
162	VSMC	hsa01524	Platinum drug resistance	18/879	73/8163	0.000561304	0.00531588	0.0038405	2950/4259/2947/2064/5295/596/9446/572/7507/4217/207/27113/653689/355/2948/2067/4257/2941	18
163	VSMC	hsa04611	Platelet activation	26/879	124/8163	0.000602831	0.00554605	0.00400679	4638/5592/5500/1278/60/1281/1277/7094/3688/2982/4659/5739/111/71/5295/10235/2983/6093/2778/109/5567/207/6915/115/9475/112	26
164	VSMC	hsa03050	Proteasome	13/879	46/8163	0.000823088	0.00736206	0.00531878	5694/5689/5714/5705/5715/5702/5710/5688/9491/5695/5683/5693/5692	13
165	VSMC	hsa05230	Central carbon metabolism in cancer	17/879	70/8163	0.000953025	0.0082939	0.00599199	5159/3945/5156/4916/5223/5315/1956/2064/5295/6513/5728/2260/207/5213/3939/2539/3265	17
166	VSMC	hsa00380	Tryptophan metabolism	12/879	42/8163	0.00116563	0.00986554	0.00712744	217/219/7166/3033/23498/4129/1892/39/224/2639/38/501	12
167	VSMC	hsa04261	Adrenergic signaling in cardiomyocytes	29/879	150/8163	0.0011949	0.00986554	0.00712744	7169/5350/7168/5500/805/70/808/481/111/5521/477/5502/818/6262/64764/596/2778/109/801/10488/781/775/5516/5567/207/115/112/468/488	29
168	VSMC	hsa00280	Valine, leucine and isoleucine degradation	13/879	48/8163	0.00127318	0.0102491	0.00740453	217/219/3033/3028/1892/4329/39/224/5019/38/30/501/84693	13
169	VSMC	hsa05218	Melanoma	17/879	72/8163	0.00133452	0.0104808	0.00757197	5159/56034/5154/1647/5156/1956/2252/5295/4286/572/10912/5728/2260/207/1643/2247/3265	17
170	VSMC	hsa04911	Insulin secretion	19/879	86/8163	0.00166574	0.0127707	0.0092263	3778/3779/481/111/477/818/6262/64764/2778/6513/109/10488/775/5567/6844/27445/115/112/468	19
171	VSMC	hsa04213	Longevity regulating pathway - multiple species	15/879	62/8163	0.00194214	0.0145435	0.0105071	1410/6647/8660/3306/111/5295/3667/109/5563/5567/207/5565/115/112/3265	15
172	VSMC	hsa04350	TGF-beta signaling pathway	20/879	94/8163	0.0020622	0.0150915	0.010903	3400/4052/6500/2331/3624/658/4756/657/7044/151449/7057/4681/25805/6093/7046/79875/5516/7043/4093/1634	20
173	VSMC	hsa04540	Gap junction	19/879	88/8163	0.00220976	0.015812	0.0114235	5592/5159/56034/5154/2982/5156/1902/111/1956/7846/2983/2778/109/84790/5567/115/112/7280/3265	19
174	VSMC	hsa04926	Relaxin signaling pathway	25/879	129/8163	0.00244554	0.0171188	0.0123676	59/1278/1281/7423/1277/111/1956/5295/5602/64764/4313/7046/55970/2778/1287/109/10488/5567/207/10681/1284/115/112/468/3265	25
175	VSMC	hsa04974	Protein digestion and absorption	21/879	103/8163	0.00280102	0.01919	0.013864	7373/1292/1278/1291/1281/1277/81578/481/1295/1293/1290/1307/477/1303/1296/1298/1287/1289/2006/1284/80781	21
176	VSMC	hsa05171	Coronavirus disease - COVID-19	39/879	232/8163	0.00301555	0.0202293	0.0146149	6176/51065/9045/716/715/6166/2197/6147/6144/1956/51187/6217/6233/5295/5602/6230/6138/6204/6143/4736/629/6133/23521/6142/7311/6193/6171/6128/6125/6141/6205/6152/6223/6207/6228/6231/6191/6129/6132	39
177	VSMC	hsa04933	AGE-RAGE signaling pathway in diabetic complications	20/879	100/8163	0.00439466	0.0288792	0.020864	1278/2335/1281/7423/1277/50507/5295/5602/596/4313/113026/7046/1287/2152/207/1284/7043/3717/51196/3265	20
178	VSMC	hsa04922	Glucagon signaling pathway	21/879	107/8163	0.00449561	0.0289518	0.0209164	805/3945/808/5223/5315/818/64764/2778/6513/801/10488/5834/5563/5567/207/5213/3939/5565/5260/5836/468	21
179	VSMC	hsa00230	Purine metabolism	24/879	128/8163	0.00460065	0.0290473	0.0209854	8654/5136/51020/5236/2982/5139/30833/5167/4833/111/1716/8622/471/2983/109/4832/203/2766/205/115/51292/2987/3704/112	24
180	VSMC	hsa05214	Glioma	16/879	75/8163	0.00540266	0.0334549	0.0241698	805/5159/5154/808/1647/5156/1956/818/5295/801/10912/5728/207/1643/8536/3265	16
181	VSMC	hsa04015	Rap1 signaling pathway	35/879	210/8163	0.00552183	0.0335477	0.0242368	5217/805/60/6237/7423/5159/56034/7094/3688/5154/284/808/5156/1902/111/1956/5216/55740/71/7057/2252/9863/5295/10235/2778/109/801/2260/207/115/2247/51196/112/3265/56288	35
182	VSMC	hsa00330	Arginine and proline metabolism	12/879	50/8163	0.00571519	0.0340795	0.024621	217/1152/219/6611/4942/2593/4129/1160/8974/224/6723/501	12
183	VSMC	hsa05132	Salmonella infection	40/879	249/8163	0.00603794	0.0353494	0.0255385	10398/5217/2316/6500/60/6237/2597/112574/6990/5216/8655/388/26999/7846/71/11258/83658/5602/596/55845/3799/10540/79443/10109/26084/84790/8976/1780/207/9265/140735/10671/10552/9367/10093/5869/55860/9475/7280/3265	40
184	VSMC	hsa04713	Circadian entrainment	19/879	97/8163	0.00684046	0.0393326	0.0284162	5592/805/2891/808/2982/111/818/6262/2983/55970/2778/109/801/775/5567/10681/115/112/51655	19
185	VSMC	hsa05100	Bacterial invasion of epithelial cells	16/879	77/8163	0.00704285	0.0397859	0.0287437	60/3611/2335/79658/3688/7414/1212/71/5295/10109/26084/8976/10552/10093/2017/1211	16
186	VSMC	hsa04520	Adherens junction	15/879	71/8163	0.0076263	0.0417825	0.0301861	10580/60/4008/7414/1956/87/71/2064/7046/2260/8976/25945/81/52/56288	15
187	VSMC	hsa01522	Endocrine resistance	19/879	98/8163	0.00765579	0.0417825	0.0301861	4854/4853/111/1956/1031/2064/5295/5602/596/4313/2778/109/572/5567/207/182/115/112/3265	19
188	VSMC	hsa05165	Human papillomavirus infection	50/879	331/8163	0.00795097	0.0426702	0.0308274	8516/1292/1278/2335/1291/3693/7058/1277/5159/3688/3679/22801/4854/23493/4853/1293/8321/894/5315/1956/5521/10474/155066/7057/5295/5986/8324/64764/1298/1741/10207/2778/1287/3685/572/10488/5728/5516/5567/207/9550/27175/1284/355/529/3675/182/57801/3265/56288	50
189	VSMC	hsa01232	Nucleotide metabolism	17/879	85/8163	0.00827021	0.0436559	0.0315395	51020/30833/5167/4833/1716/51727/1503/115024/4832/203/2766/1854/205/83549/51292/2987/3704	17
190	VSMC	hsa01521	EGFR tyrosine kinase inhibitor resistance	16/879	79/8163	0.00906126	0.0470601	0.0339989	2621/5159/56034/5154/5156/558/1956/2064/5295/596/572/5728/207/3717/2247/3265	16
